# Supplementary material for: HEI10 is subject to phase separation and mediates RPA1a degradation during meiotic interference-sensitive crossover formation
Source: PubMed Central journal article supplement — Proc Natl Acad Sci U S A. 2023 Dec 22;120(52):e2310542120. doi: 10.1073/pnas.2310542120 (PMC10756261; doi:10.1073/pnas.2310542120), 2023-12-22
Supplement: pnas.2310542120.sapp.pdf [file pnas.2310542120.sapp.pdf]

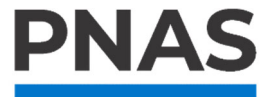

## Supporting Information for

HEI10 is Subject to Phase Separation and Mediates RPA1a Degradation during Meiotic  
Interference-sensitive Crossover Formation

Tianyi Wang, Hongkuan Wang, Qichao Lian, Qian Jia, Chenjiang You, Gregory P.  
Copenhaver\*, Cong Wang\*, and Yingxiang Wang\*

Corresponding authors: Yingxiang Wang; Cong Wang; Gregory P. Copenhaver

Email: [yx\\_wang@fudan.edu.cn](mailto:yx_wang@fudan.edu.cn); [wangc@scau.edu.cn](mailto:wangc@scau.edu.cn); [gcopenhaver@bio.unc.edu](mailto:gcopenhaver@bio.unc.edu)

### **This PDF file includes:**

Figures S1 to S6

Tables S1 to S2

### **Other Supporting Information Files**

Dataset S1

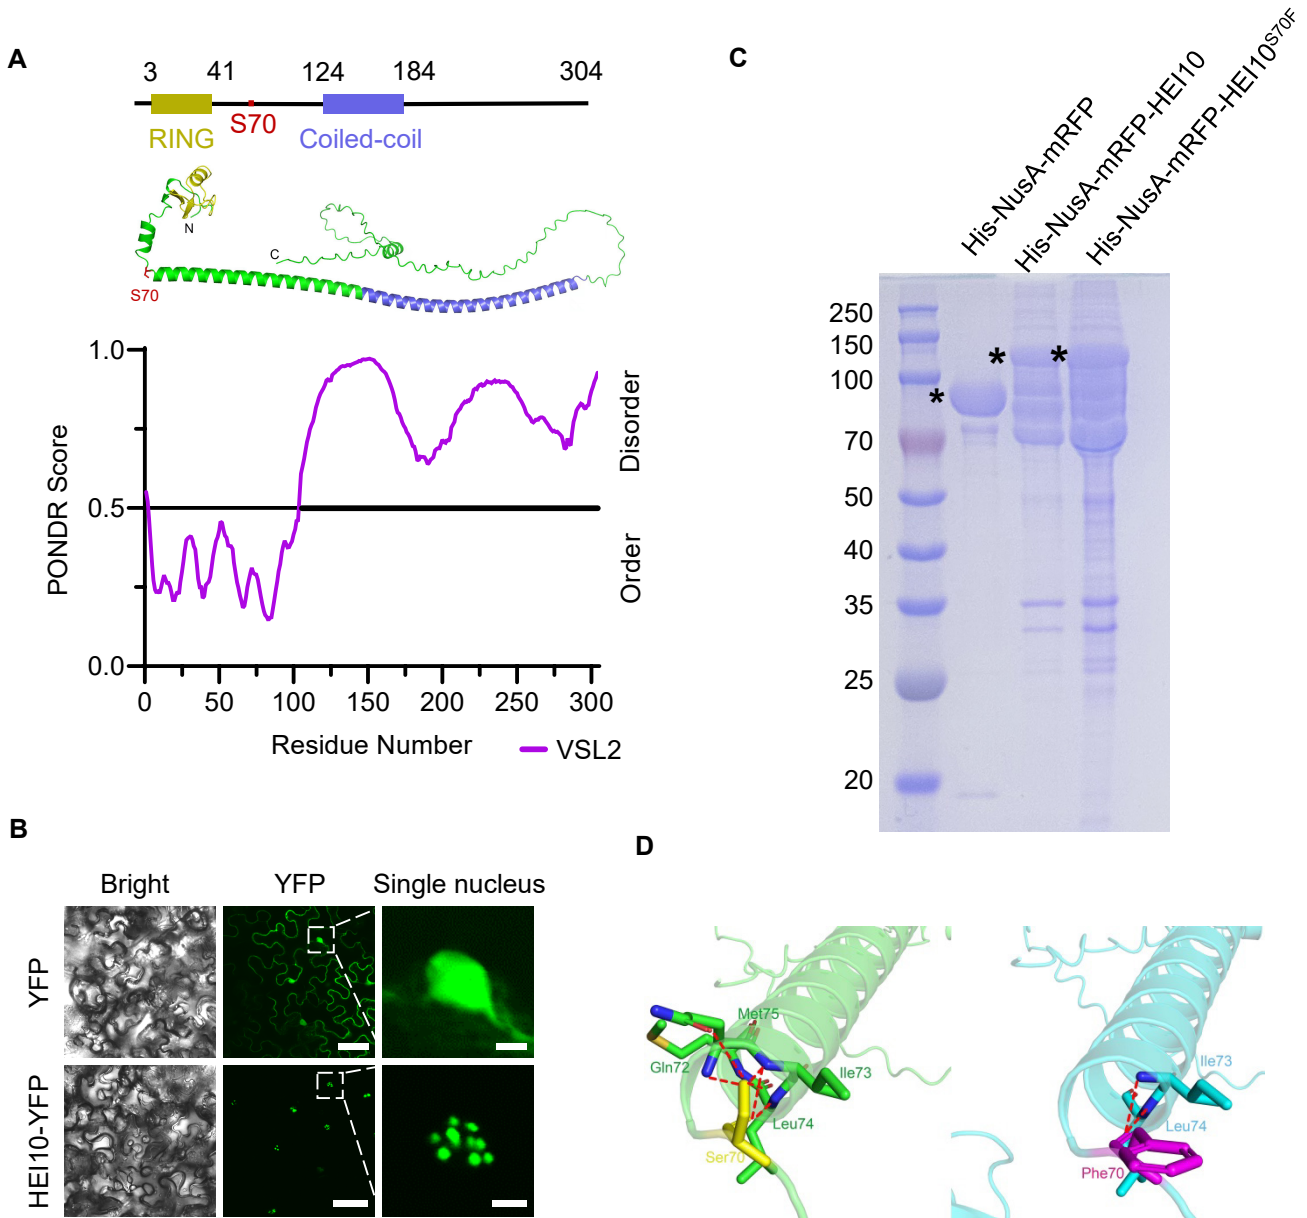

**Fig. S1. Characteristics and localization of the HEI10 protein**

(A) Top, protein domain structure of HEI10. Middle, 3D structure of HEI10. Bottom, predictions of IDR (intrinsically disordered region), by PONDR ([www.pondr.com](http://www.pondr.com)).

(B) Localization of HEI10-YFP in tobacco nuclei by fluorescence microscopy after treated with MMS. The images of single nucleus in the right pane are enlarged regions in the yellow boxes. Bar= 50 $\mu$ m (left), 5 $\mu$ m (right).

(C) Coomassie staining of His-NusA-mRFP, His-NusA-mRFP-HEI10 and His-NusA-mRFP-HEI10<sup>S70F</sup>. Asterisks indicate the fusion protein bands.

(D) The hydrogen bonding interactions of the residue 70 and adjacent  $\alpha$ -helix predicted by ESMFold. The hydrogen-bonding interactions are shown with red dotted lines. The Ser70 residue (yellow) can interact with Gln72, Ile73, Leu74 and Met75, and the Phe70 (purple) residue can only interact with Ile73 and Leu74.

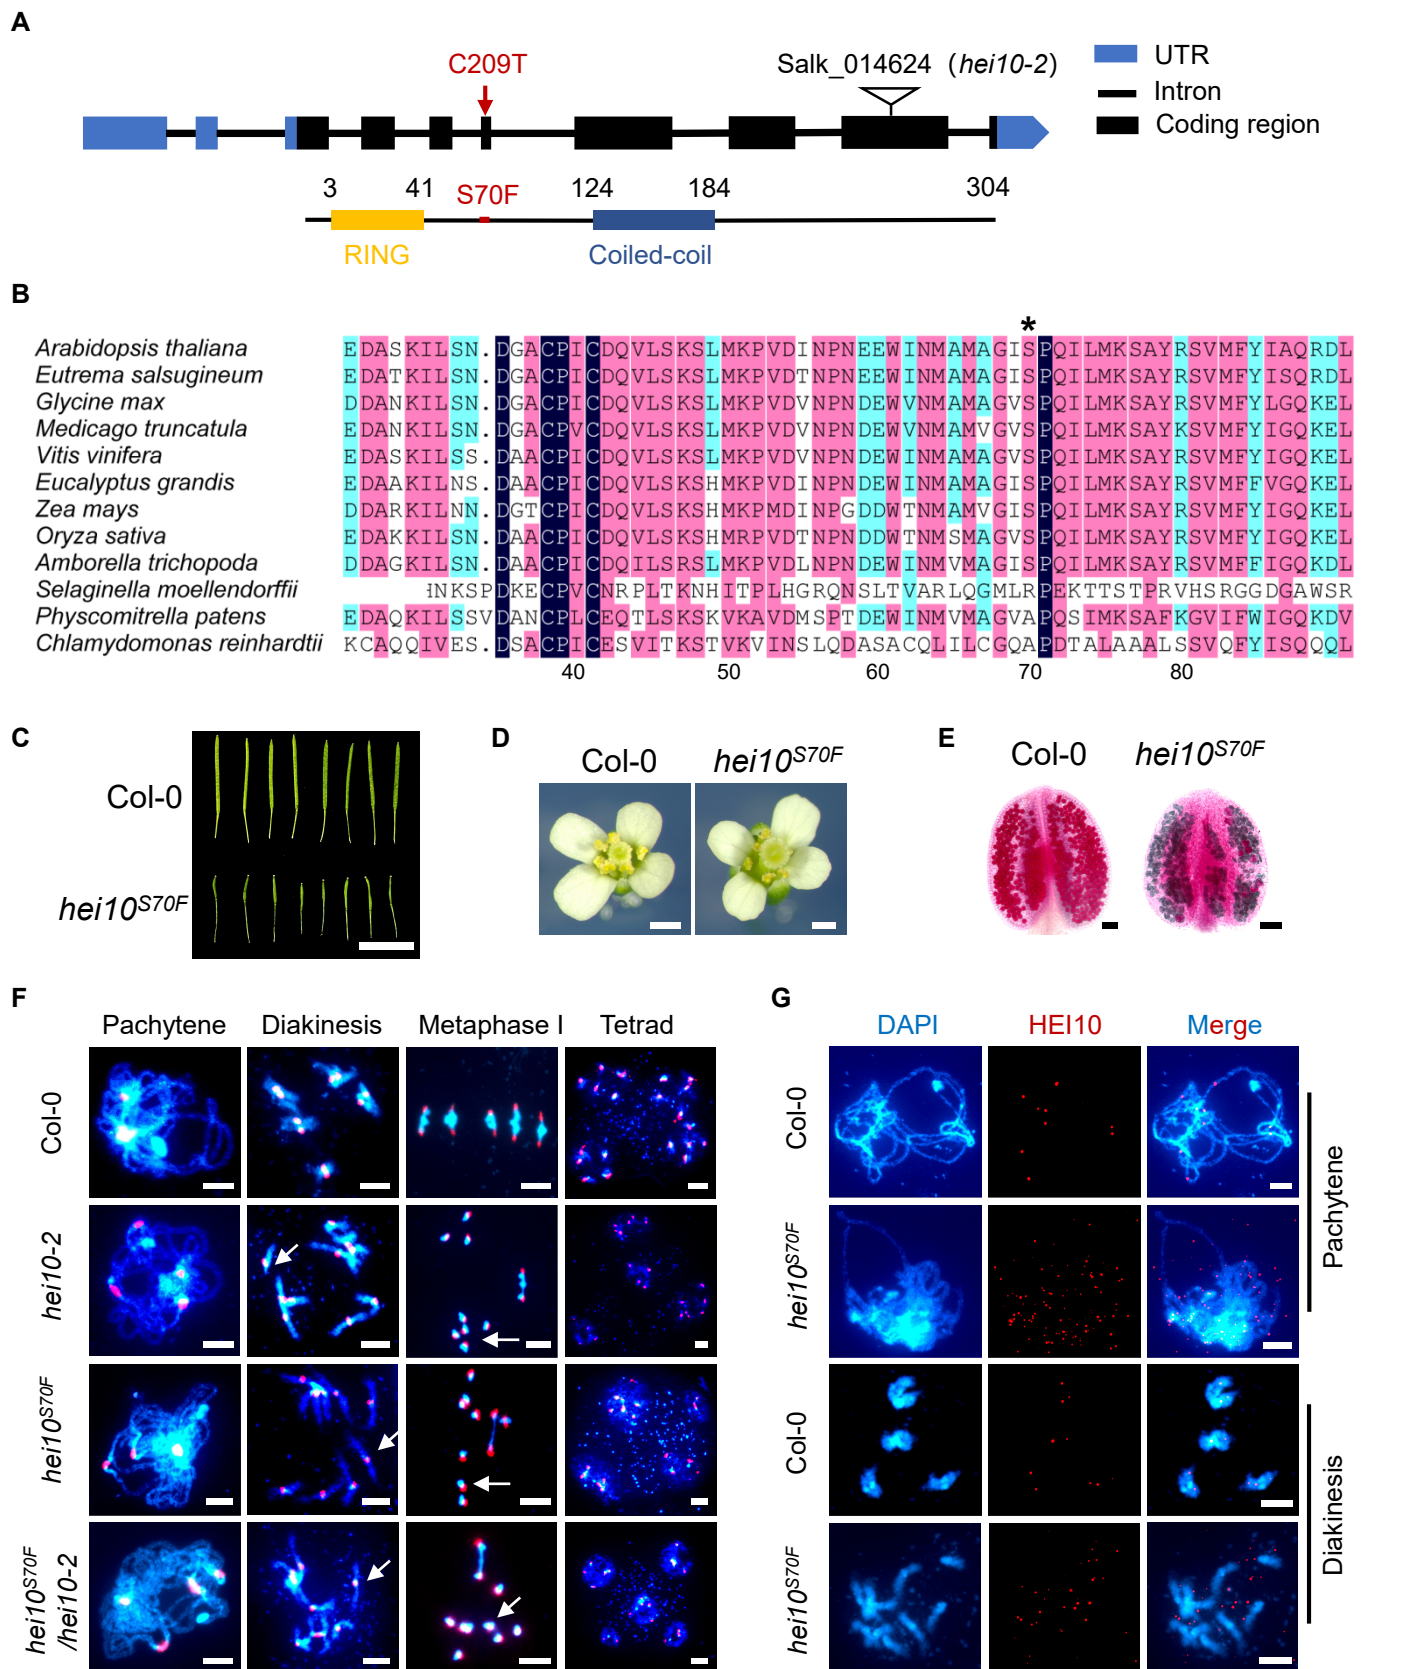

**Fig. S2. *hei10<sup>S70F</sup>* exhibits meiotic defects similar to *hei10-2* allele**

(A) Diagrams showing genomic and protein structures of HEI10. Mutations of *hei10-2* and *hei10<sup>S70F</sup>* are marked above the gene structure.

(B) Multiple sequence alignment of HEI10 orthologs in plants using DNAMAN 7.0. Asterisk indicates the Ser70 site.

(C) Siliques of Col-0 and *hei10<sup>S70F</sup>*. Bar=1cm.

(D) Open flowers of Col-0 and *hei10<sup>S70F</sup>*. Bar=1mm.

(E) Alexander staining of Col-0 and *hei10<sup>S70F</sup>* anthers. Bar=50µm.

(F) The centromere FISH of meiotic chromosomes at pachytene, diakinesis, metaphase I and tetrad stage in Col-0, *hei10-2*, *hei10<sup>S70F</sup>* and *hei10<sup>S70F</sup>/hei10-2*. Bar=5µm. Arrows indicate univalents at diakinesis and metaphase I.

(G) Immunostaining of HEI10 at pachytene and diakinesis in Col-0 and *hei10<sup>S70F</sup>* with HEI10 antibody. Bar=5µm.

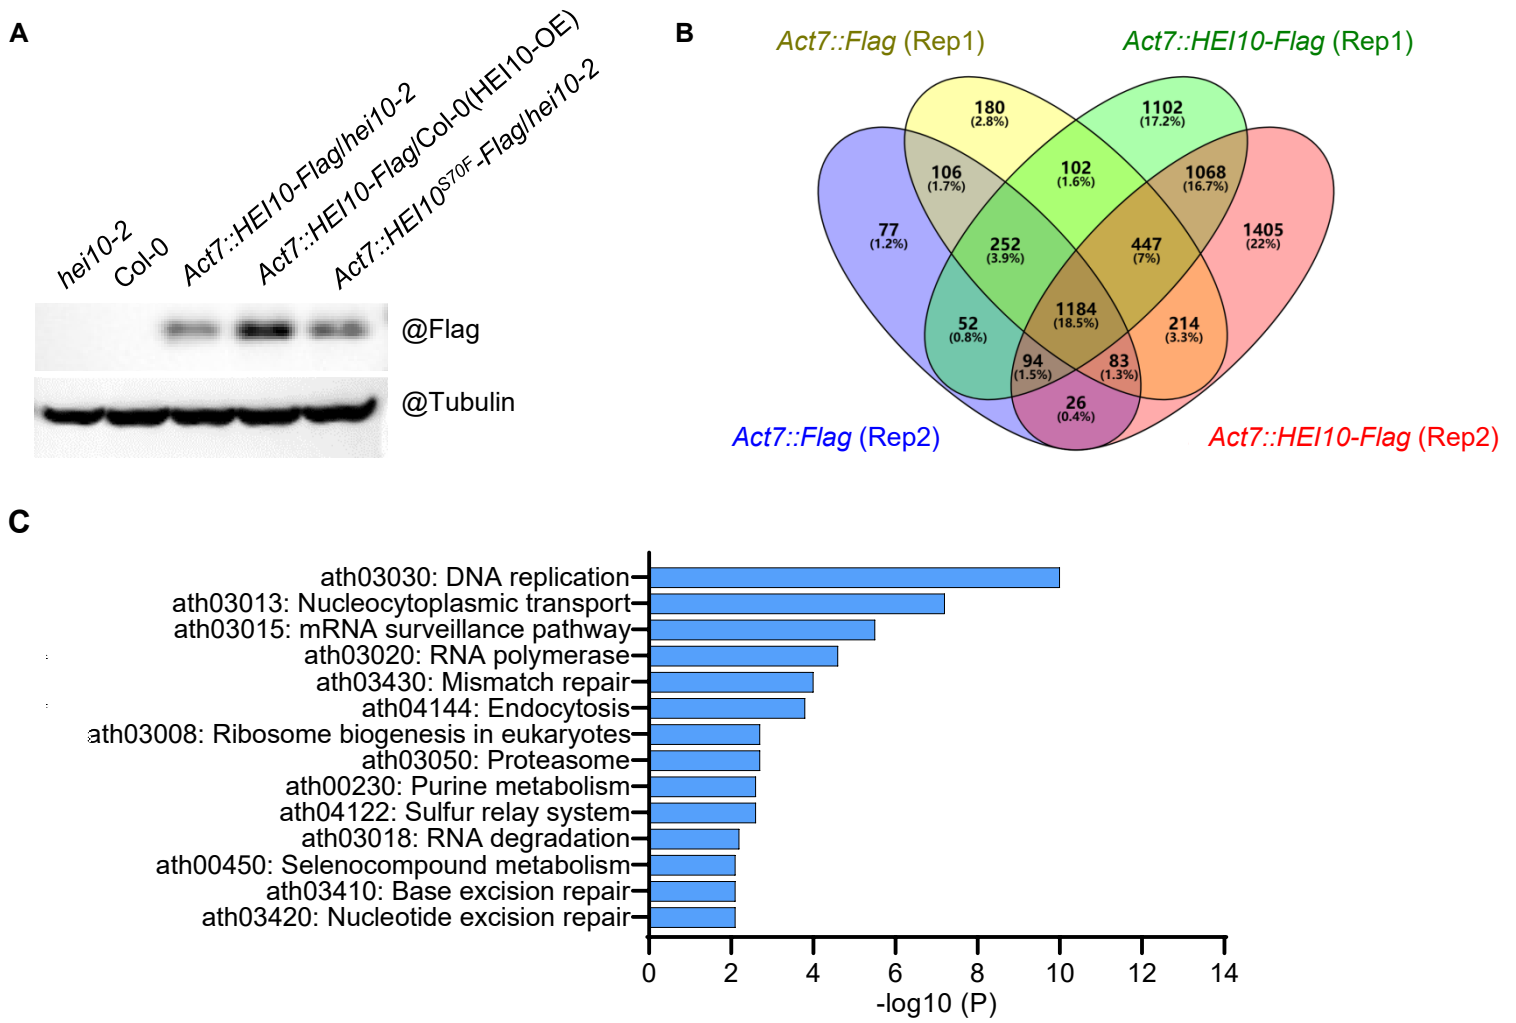

**Fig. S3. Identification of HEI10 interacting proteins by IP-MS**

(A) Detection of the HEI10 protein levels in HEI10 transgenic lines by anti-Flag antibody.

(B) Venn diagram for the identified proteins by IP-MS using the inflorescences of *Act7::HEI10-Flag* and *Act7::Flag*. The venn diagram is drawn by Venny 2.1 (<https://bioinfogp.cnb.csic.es/tools/venny/>).

(C) KEGG pathway enrichment of the 1,068 candidates identified in (B) is analyzed by Metascape (<https://metascape.org>).

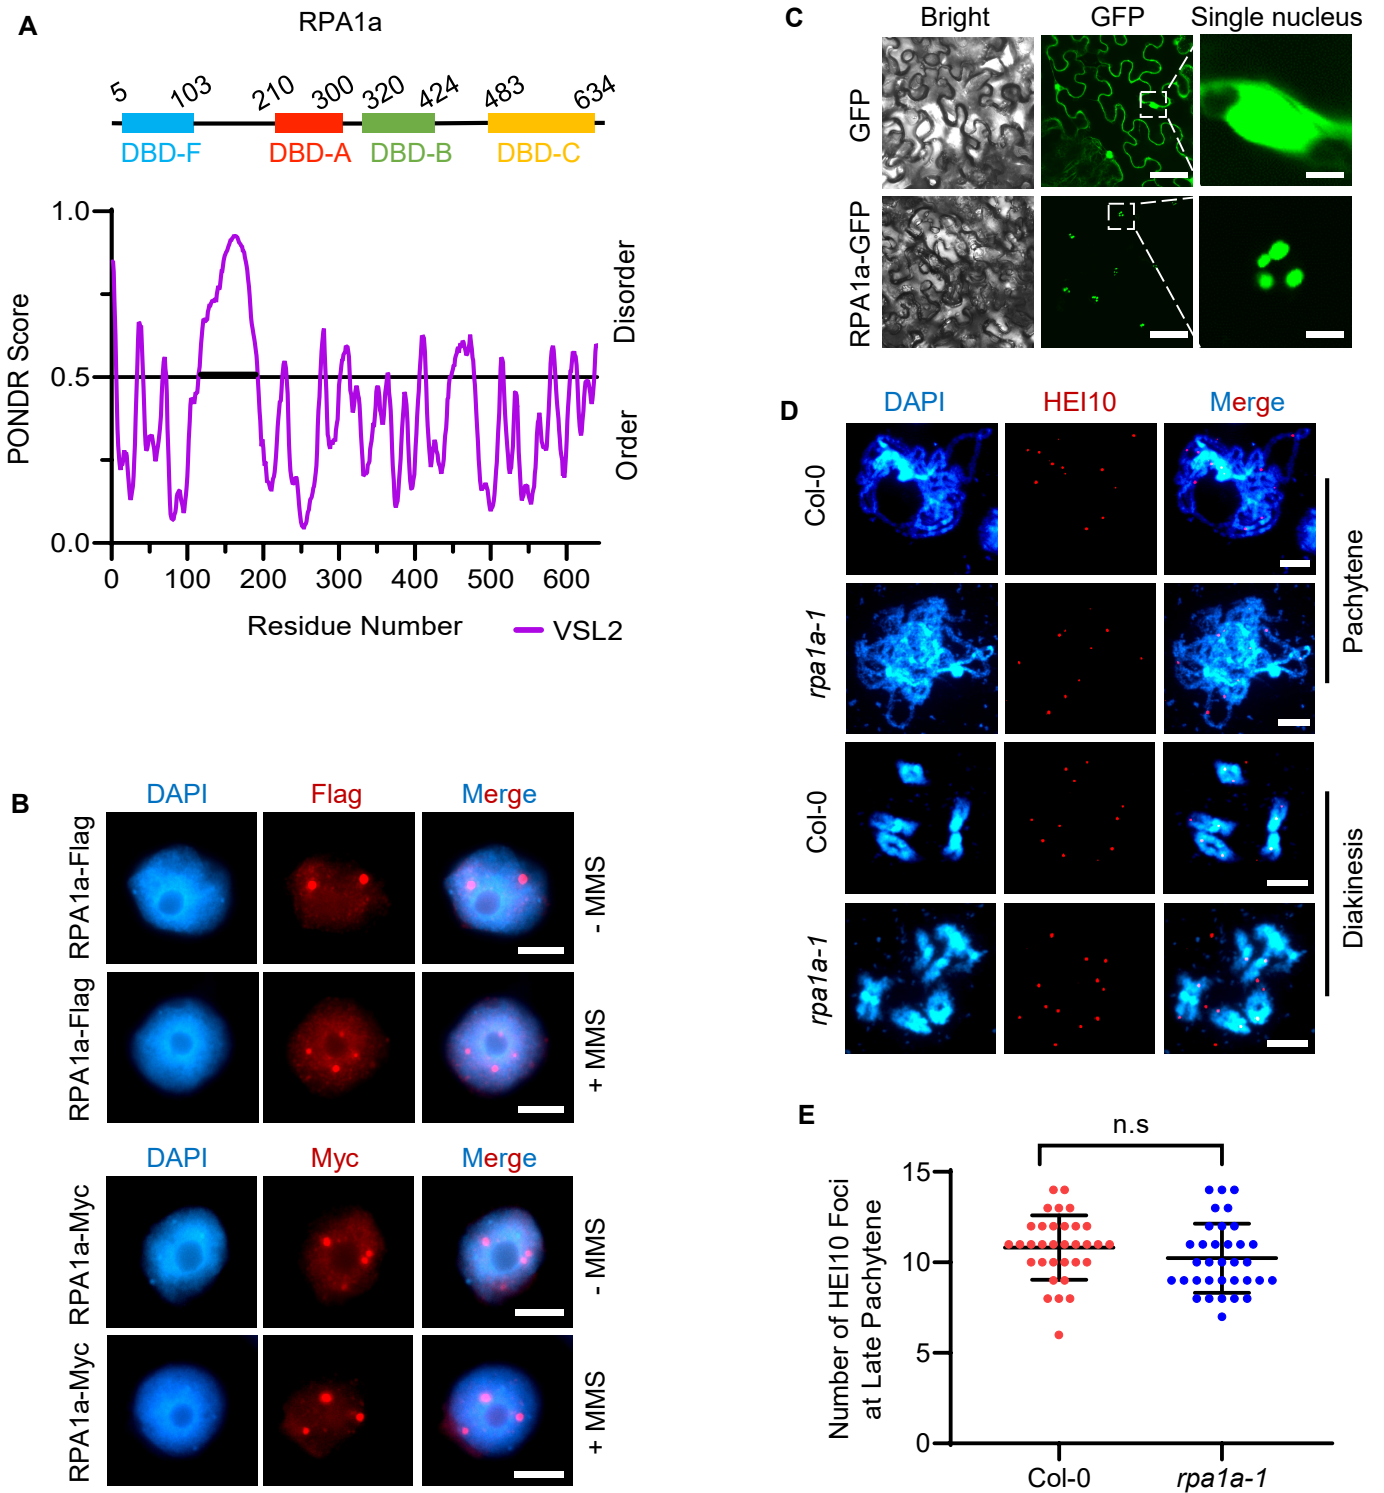

**Fig. S4. RPA1a can undergo phase separation independent of HEI10 *in vivo***

(A) Top, protein domain structure of RPA1a. Bottom, predictions of IDRs by PONDNR.

(B) Immunostaining of tobacco nuclei that express RPA1a-Flag/Myc. Bar=5 $\mu$ m.

(C) Localization of RPA1a-GFP in tobacco nuclei by fluorescence microscopy. The images of single nucleus in the right pane are enlarged regions in the white boxes. Bar= 50  $\mu$ m (left), 5  $\mu$ m (right).

(D) Immunostaining of HEI10 in Col-0 and *rpa1a-1* at pachytene and diakinesis. Bar=5 $\mu$ m.

(E) Statistical analysis of the HEI10 foci at late pachytene in Col-0 and *rpa1a-1* (two-tailed student's t-test).

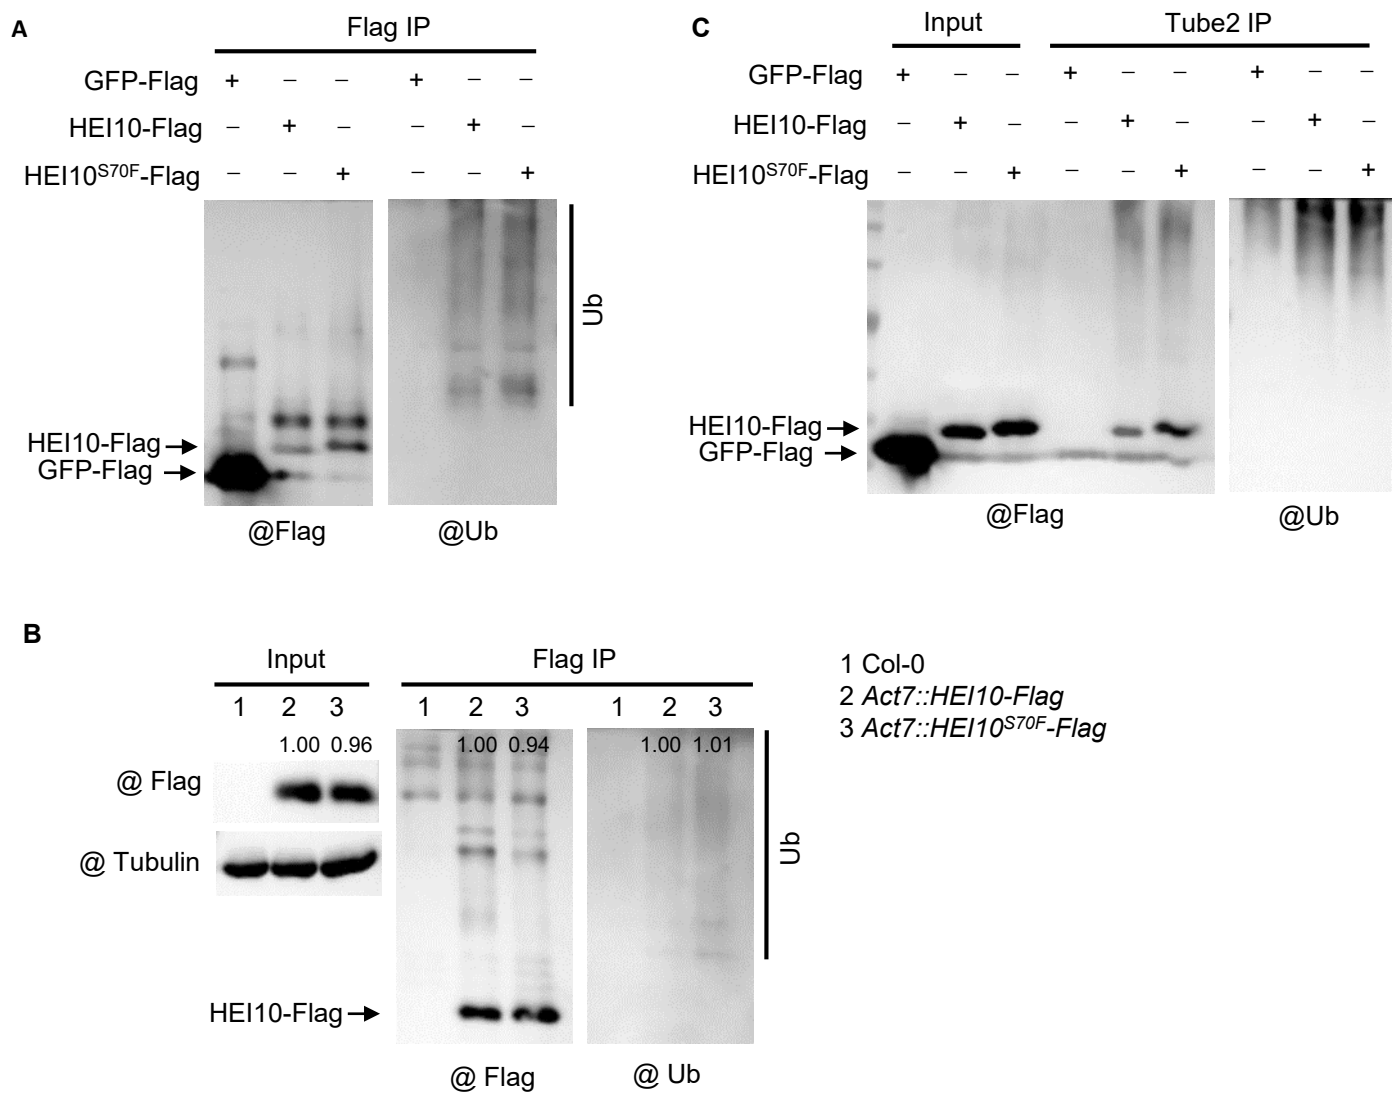

**Fig. S5. HEI10 has the ubiquitination E3 ligase activity**

(A) Detection of ubiquitination levels of HEI10 and HEI10<sup>S70F</sup> immunoprecipitated in tobacco cells by anti-Flag and anti-UBQ11 antibodies. GFP-flag is used as the negative control.

(B) Detection of ubiquitination levels of HEI10 and HEI10<sup>S70F</sup> immunoprecipitated in *Arabidopsis* central inflorescence by anti-Flag and anti-UBQ11 antibodies. The Col-0 sample is used as negative control.

(C) Tube2 IP detects the enrichment of ubiquitin-modified HEI10 proteins in tobacco cells. GFP-flag is used as the negative control.

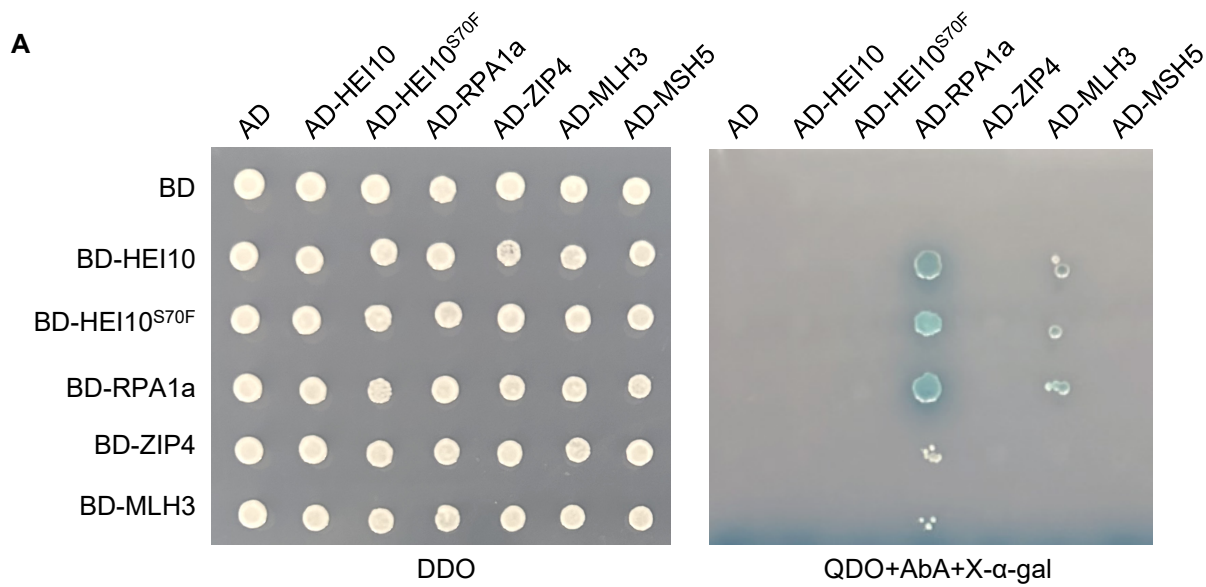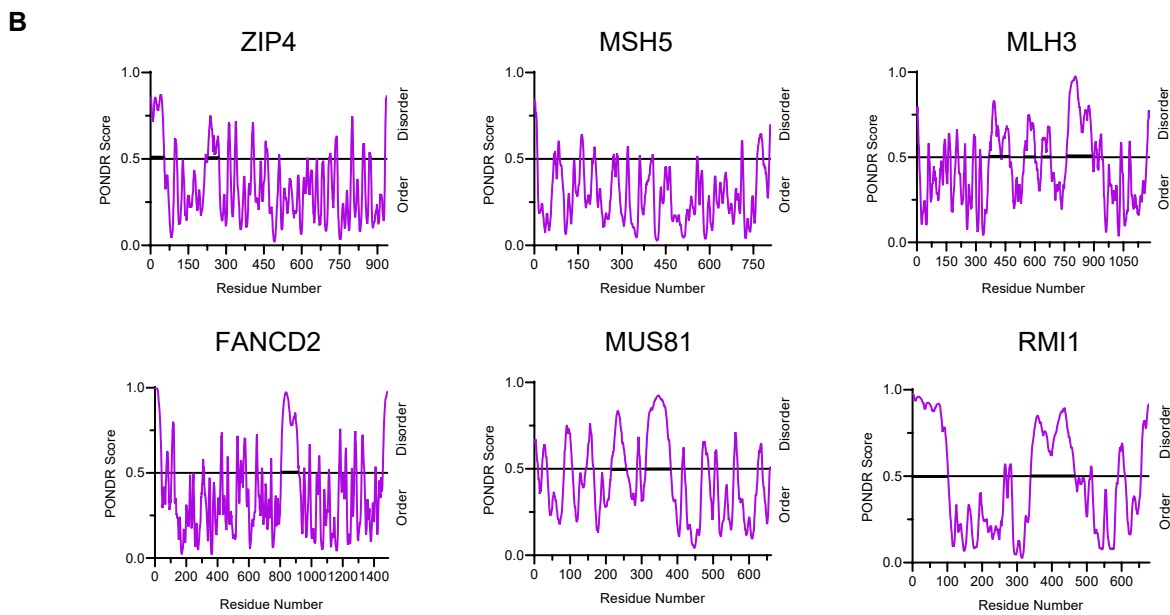

**Fig. S6. Interaction of HEI10 with Class I CO proteins and prediction of meiotic recombination factors' IDRs**

(A) Interaction of HEI10 with RPA1a, ZIP4, MSH5 and MLH3 in yeast two-hybrid assay. The initial concentration is "OD<sub>600</sub>≈0.5", spotted on DDO (synthetic dropout media lacking leucine and tryptophan) and QDO (synthetic dropout media lacking leucine, tryptophan, histidine and adenine) for 5 days.

(B) Prediction of IDRs for other meiotic recombination factors by PONDNR.

**Table S1. List of meiotic genes identified by IP-MS of HEI10**

| Identified gene | Description                                                                       | Sum PEP Score |        |         |
|-----------------|-----------------------------------------------------------------------------------|---------------|--------|---------|
|                 |                                                                                   | Rep1          | Rep2   | Average |
| AT4G01370       | ATMPK4<br>Protein<br>phosphatase 2A                                               | 6.976         | 75.69  | 41.333  |
| AT5G03470       | regulatory B<br>subunit family<br>protein                                         | 3.116         | 73.783 | 38.4495 |
| AT3G48750       | CDC2, CDC2A,<br>CDC2AAT,<br>CDK2, CDKA1,<br>CDKA;1, CELL<br>DIVISION<br>CONTROL 2 | 23.655        | 45.75  | 34.7025 |
| AT2G47980       | SCC3                                                                              | 3.362         | 43.982 | 23.672  |
| AT1G75950       | ASK1/SKP1/UIP1                                                                    | 11.96         | 29.697 | 20.8285 |
| AT3G12280       | ATRBR1                                                                            | 5.126         | 19.186 | 12.156  |
| AT2G27170       | SMC3                                                                              | 2.72          | 18.261 | 10.4905 |
| AT5G22010       | ATRFC1                                                                            | 9.668         | 5.088  | 7.378   |
| AT3G54670       | ATSMC1                                                                            | 4.931         | 9.571  | 7.251   |
| AT2G06510       | ATRPA1A                                                                           | 5.252         | 8.99   | 7.121   |
| AT5G19400       | SMG7                                                                              | 2.586         | 3.84   | 3.213   |



**Table S2. List of primers used in this study**

---

| Primers for transgene expression |                                                |
|----------------------------------|------------------------------------------------|
| 35S/Act7-HEI10-Flag-BamHI-F      | GAGCTCGGTACCCGGGGATCCATGAGATGCAACG<br>CGTGTT   |
| 35S/Act7-HEI10-Flag-Sall-R       | GATCCAAGGGCGAATTGGTCGACTAGCGTGAACAG<br>CTGAGGG |
| 35S-RPA1a-Flag-KpnI-F            | CGGGGGACGAGCTCGGTACCATGCCGGTGAGTTT<br>GACTCC   |
| 35S-RPA1a-Flag-BamHI-R           | TGGTCGACTCTAGAGGATCCCCTTACGAGCAAATC<br>AAGCA   |
| 35S-RPA1a-Myc-SacI-F             | AGAACACGGGGACGAGCTCATGCCGGTGAGTTT<br>GACTCC    |
| 35S-RPA1a-Myc-Sall-R             | ATGAGCTTTTGCTCGTCGACCCTTACGAGCAAATCA<br>AGCA   |
| 35S-RPA1a-GFP-KpnI-F             | CGGGGGACGAGCTCGGTACCATGCCGGTGAGTTT<br>GACTCC   |
| 35S-RPA1a-GFP-BamHI-R            | ATGTGCGACTCTAGAGGATCCCCTTACGAGCAAATCA<br>AGCA  |
| 35S-GFP-Flag-BamHI-F             | AGCTCGGTACCCGGGGATCCATGGTGAGCAAGGG<br>CGAGGA   |
| 35S-GFP-Flag-Sall-R              | CCAAGGGCGAATTGGTCGACCTTGACAGCTCGTC<br>CATGCC   |
| 35S-ZIP4-GFP-KpnI-F              | CGGGGGACGAGCTCGGTACCATGAGAATCGCCGA<br>GATCAC   |
| 35S-ZIP4-GFP-BamHI-R             | ATGTGCGACTCTAGAGGATCCAGCAGAAGAACTTT<br>GGTCT   |
| 35S-MSH5-GFP-KpnI-F              | CGGGGGACGAGCTCGGTACCATGGAGGAAATGGA<br>AGACAC   |
| 35S-MSH5-GFP-BamHI-R             | ATGTGCGACTCTAGAGGATCCGGAAGTGAAGATATCT<br>TGAA  |
| 35S-MLH3-GFP-KpnI-F              | CGGGGGACGAGCTCGGTACCATGAAGACGATCAA<br>GCCCTT   |
| 35S-MLH3-GFP-BamHI-R             | ATGTGCGACTCTAGAGGATCCACTTTTAGCGTTGTCT<br>AAGC  |
| 35S-FANCD2-GFP-KpnI-F            | CGGGGGACGAGCTCGGTACCATGGTGTTTCTCTCT<br>CGCAA   |
| 35S-FANCD2-GFP-BamHI-R           | ATGTGCGACTCTAGAGGATCCAGGTGTCAATGGAAG<br>TTCAT  |
| 35S-MUS81-GFP-KpnI-F             | CGGGGGACGAGCTCGGTACCATGGATGACGAGAG<br>ACGGGT   |
| 35S-MUS81-GFP-BamHI-R            | ATGTGCGACTCTAGAGGATCCTTCACCCCAACTAAC<br>TTGA   |
| 35S-RMI1-GFP-KpnI-F              | CGGGGGACGAGCTCGGTACCATGCGTAGACGGCG<br>CCTGCA   |

35S-RMI1-GFP-BamHI-R ATGTCGACTCTAGAGGATCCAGGGGACAGAACAAC  
AACTG

---

Primers for Yeast Two Hybrid

---

|            |                                                     |
|------------|-----------------------------------------------------|
| AD-RPA1a-F | GTACCAGATTACGCTCATATGATGCCGGTGAGTTTG<br>ACTCC       |
| AD-RPA1a-R | CAGCTCGAGCTCGATGGATCCTTACCTTACGAGCA<br>AATCAAGCATGT |
| BD-RPA1a-F | TCAGAGGAGGACCTGCATATGATGCCGGTGAGTTT<br>GACTCC       |
| BD-RPA1a-R | CCGCTGCAGGTCGACGGATCCTTACCTTACGAGCA<br>AATCAAGCATGT |
| AD-HEI10-F | GTACCAGATTACGCTCATATGATGAGATGCAACGCG<br>TG          |
| AD-HEI10-R | CAGCTCGAGCTCGATGGATCCCTATAGCGTGAACA<br>GCTGAGG      |
| BD-HEI10-F | TCAGAGGAGGACCTGCATATGATGAGATGCAACGC<br>GTG          |
| BD-HEI10-R | CCGCTGCAGGTCGACGGATCCCTATAGCGTGAACA<br>GCTGAGG      |
| AD-ZIP4-F  | TACCAGATTACGCTCATATGATGAGAATCGCCGAGA<br>TCAC        |
| AD-ZIP4-R  | AGCTCGAGCTCGATGGATCCAGCAGAAGAACTTT<br>GGTCT         |
| BD-ZIP4-F  | CAGAGGAGGACCTGCATATGATGAGAATCGCCGAG<br>ATCAC        |
| BD-ZIP4-R  | CGCTGCAGGTCGACGGATCCAGCAGAAGAACTTT<br>GGTCT         |
| BD-MLH3-F  | CAGAGGAGGACCTGCATATGATGAAGACGATCAAG<br>CCCTT        |
| BD-MLH3-R  | CGCTGCAGGTCGACGGATCCACTTTTAGCGTTGTC<br>TAAGC        |
| AD-MLH3-F  | TACCAGATTACGCTCATATGATGAAGACGATCAAGC<br>CCTT        |
| AD-MLH3-R  | AGCTCGAGCTCGATGGATCCACTTTTAGCGTTGTCT<br>AAGC        |
| AD-MSH5-F  | TACCAGATTACGCTCATATGATGGAGGAAATGGAAG<br>ACAC        |
| AD-MSH5-R  | AGCTCGAGCTCGATGGATCCGGAAGTGAAGATATC<br>TTGAA        |

---

Primers for recombinant protein expression

---

|                  |                                              |
|------------------|----------------------------------------------|
| His-Sumo-HEI10-F | ACAGAGAACAGATTGGTGGATCCATGAGATGCAAC<br>GCGTG |
| His-Sumo-HEI10-R | GCGGCCGCAAGCTTGTGCGACTAGCGTGAACAGCT          |

|                       |                                                              |
|-----------------------|--------------------------------------------------------------|
|                       | GAGG                                                         |
| GST-RPA1a-F           | ATCTGGTTCCGCGTGGATCCATGCCGGTGAGTTTG<br>ACTCC                 |
| GST-RPA1a-R           | GATGCGGCCGCTCGAGTCGACTTACCTTACGAGCA<br>AATCAAGC              |
| His-Sumo-RPA1a-F      | ACAGAGAACAGATTGGTGGATCCATGCCGGTGAGT<br>TTGACTCC              |
| His-Sumo-RPA1a-R      | GCGGCCGCAAGCTTGTGACCCTTACGAGCAAATC<br>AAGCAT                 |
| His-NusA-mRFP-F       | TCCTCTTTCAGGGACCCGGGATGGCCTCCTCCGA<br>GGACGT                 |
| His-NusA-mRFP-R       | TAGGTTAATTAAGCCTCGAGGGCGCCGGTGGAGTG<br>GCGGC                 |
| mRFP-linker-HEI10-F   | GGTCCGTCTGGACCGAGCGGCCCGTCAGGTCCGA<br>GTATGAGATGCAACGCGTGTTG |
| mRFP-linker-HEI10-R   | ACTCGGACCTGACGGGCCGCTCGGTCCAGACGGA<br>CCGGCGCCGGTGGAGTGGCGGC |
| His-NusA-mRFP-HEI10-R | TAGGTTAATTAAGCCTCGAGTAGCGTGAACAGCTGA<br>GGGC                 |

---

Primers for genotyping mutant alleles

---

|            |                        |
|------------|------------------------|
| hei10-2-LP | GCAAGGAGTTCCCAGAGATG   |
| hei10-2-RP | CCAAGAACCCGACTTTTTTCTC |
| rpa1a-1-LP | GCCAGGAGAGGTATCGTTTC   |
| rpa1a-1-RP | TCGACCTTGGTATGGATTGAG  |
| LBb1.3     | ATTTTGCCGATTTCCGGAAC   |

---
